## Technical Datasheet

Order Id 639599

Order Date 28.06.2019

### Mycoplasma\_F

Oligo Id **3508939**

|                                         |      |                 |          |                  |                 |                   |           |
|-----------------------------------------|------|-----------------|----------|------------------|-----------------|-------------------|-----------|
| Type                                    | DNA  | Synthesis scale | Genomics | Molecular weight | 7724.0 g/mol    | Amount            | 12.55 OD  |
| 5' Modification                         | NONE | Purification    | Desalted | Ext. coefficient | 263.0 1/(mM·cm) |                   | 47.7 nmol |
| 3' Modification                         | NONE | Length          | 25 nt    | Tm (50 mM NaCl)  | 65.8 °C         |                   | 368.5 µg  |
| No internal modifications               |      |                 |          | Tm (NN-Method)   | 56.5 °C         | Volume for 100 µM | 477.1 µl  |
| 5'-GGG AGC AAA CAG GAT TAG ATA CCC T-3' |      |                 |          |                  |                 |                   |           |

### Mycoplasma\_R

Oligo Id **3508940**

|                                           |      |                 |          |                  |                 |                   |           |
|-------------------------------------------|------|-----------------|----------|------------------|-----------------|-------------------|-----------|
| Type                                      | DNA  | Synthesis scale | Genomics | Molecular weight | 8121.3 g/mol    | Amount            | 13.43 OD  |
| 5' Modification                           | NONE | Purification    | Desalted | Ext. coefficient | 237.9 1/(mM·cm) |                   | 56.5 nmol |
| 3' Modification                           | NONE | Length          | 27 nt    | Tm (50 mM NaCl)  | 68.2 °C         |                   | 458.7 µg  |
| No internal modifications                 |      |                 |          | Tm (NN-Method)   | 59.2 °C         | Volume for 100 µM | 564.8 µl  |
| 5'-TGC ACC ATC TGT CAC TCT GTT AAC CTC-3' |      |                 |          |                  |                 |                   |           |
