S3A Fig :  
OCT4A\*

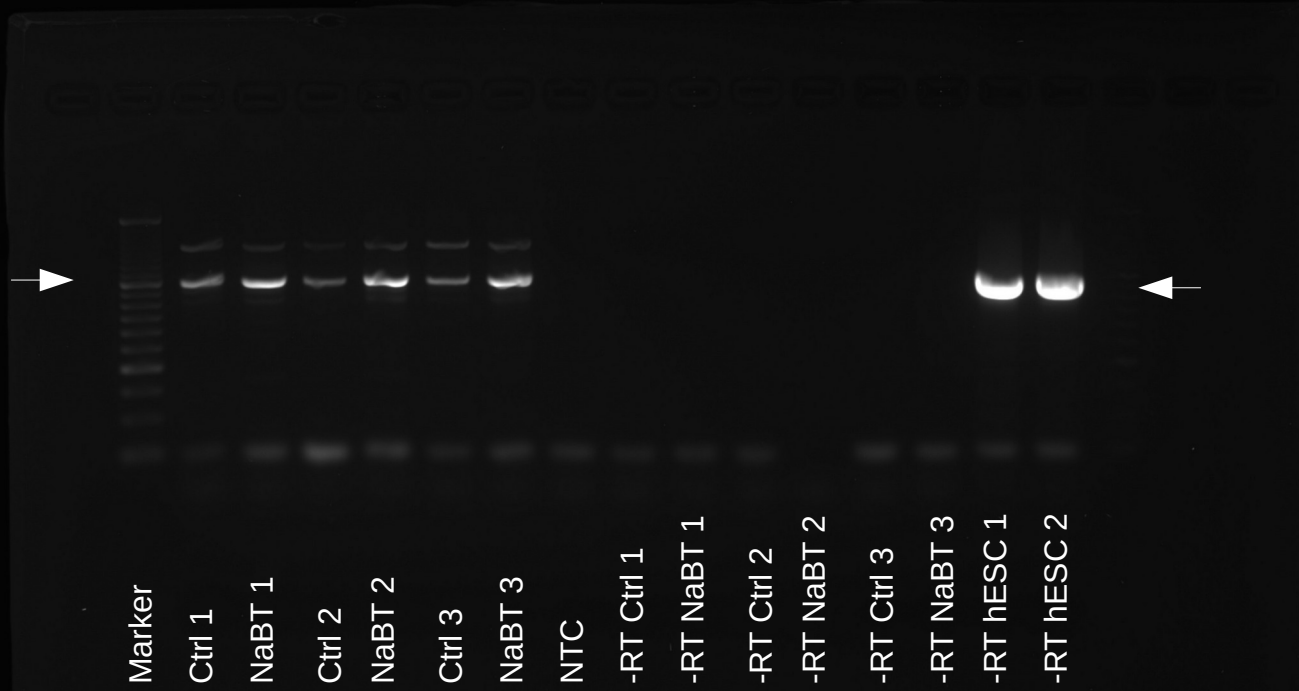

S3A Fig :  
OCT4B1  
OCT4B  
OCT4B4

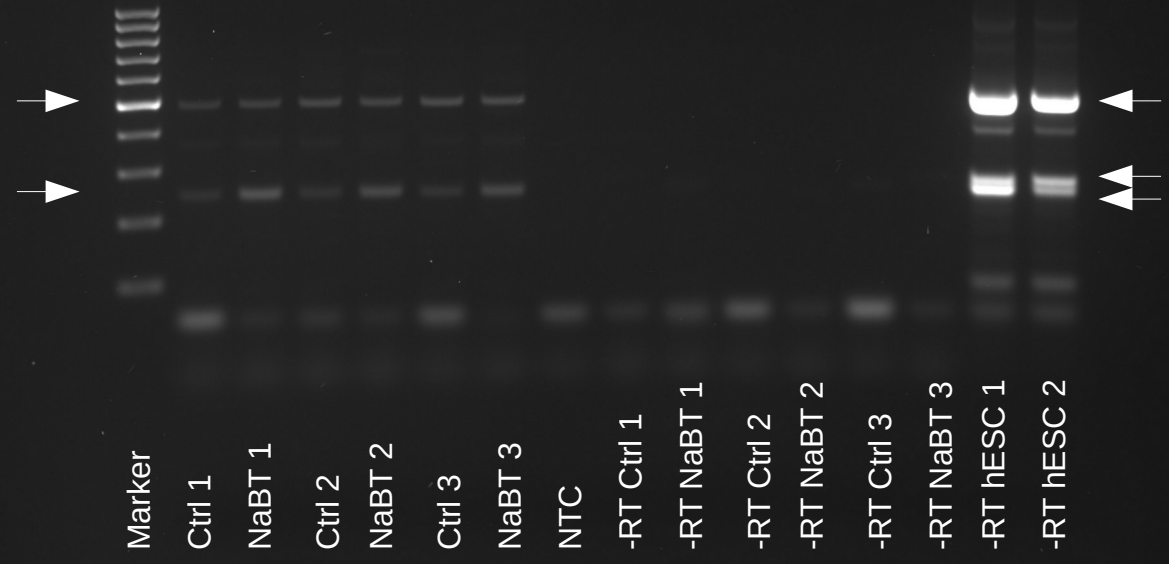

S3A Fig :  
NANOG1  
NANOG2

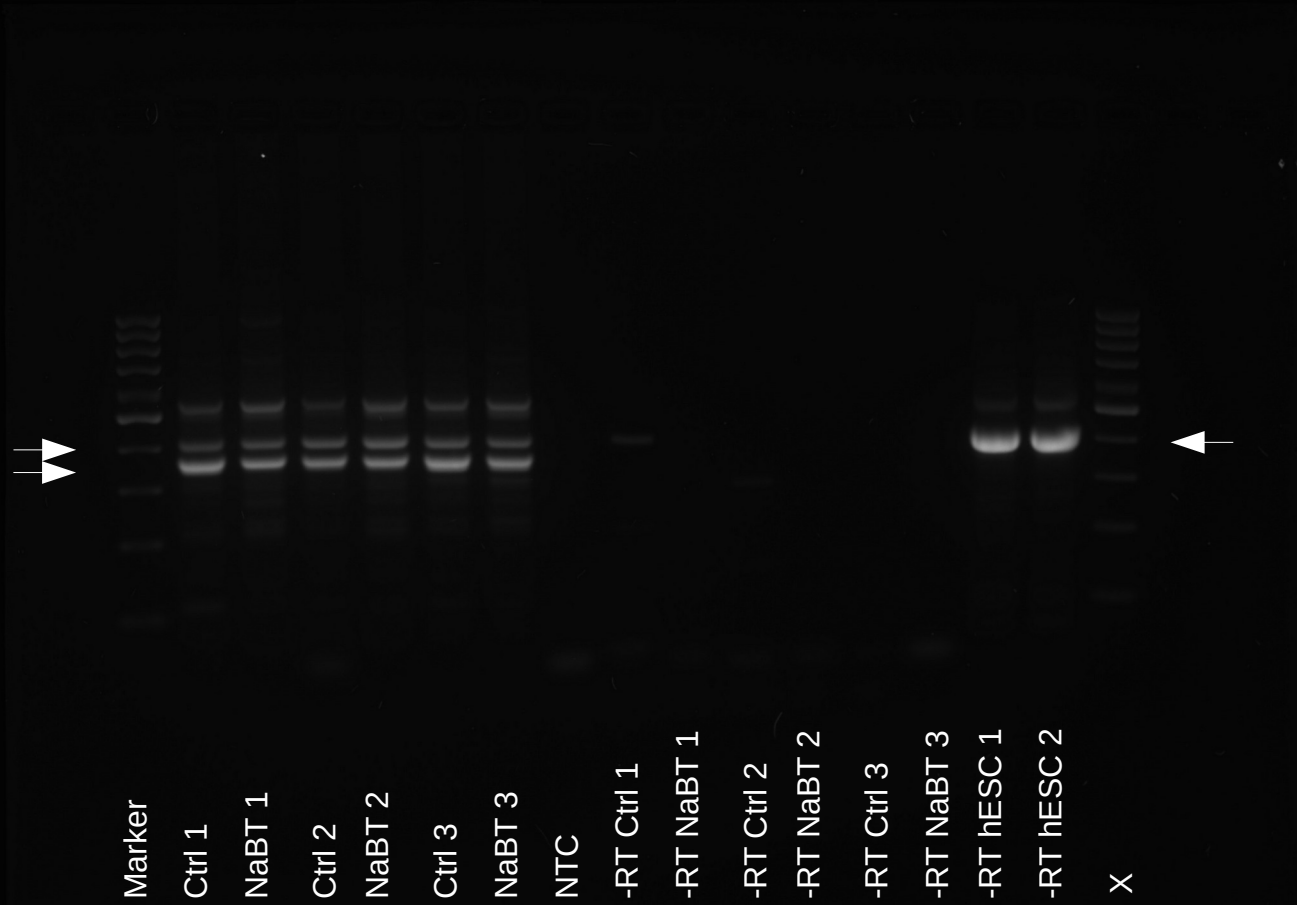

S3A Fig :  
SOX2

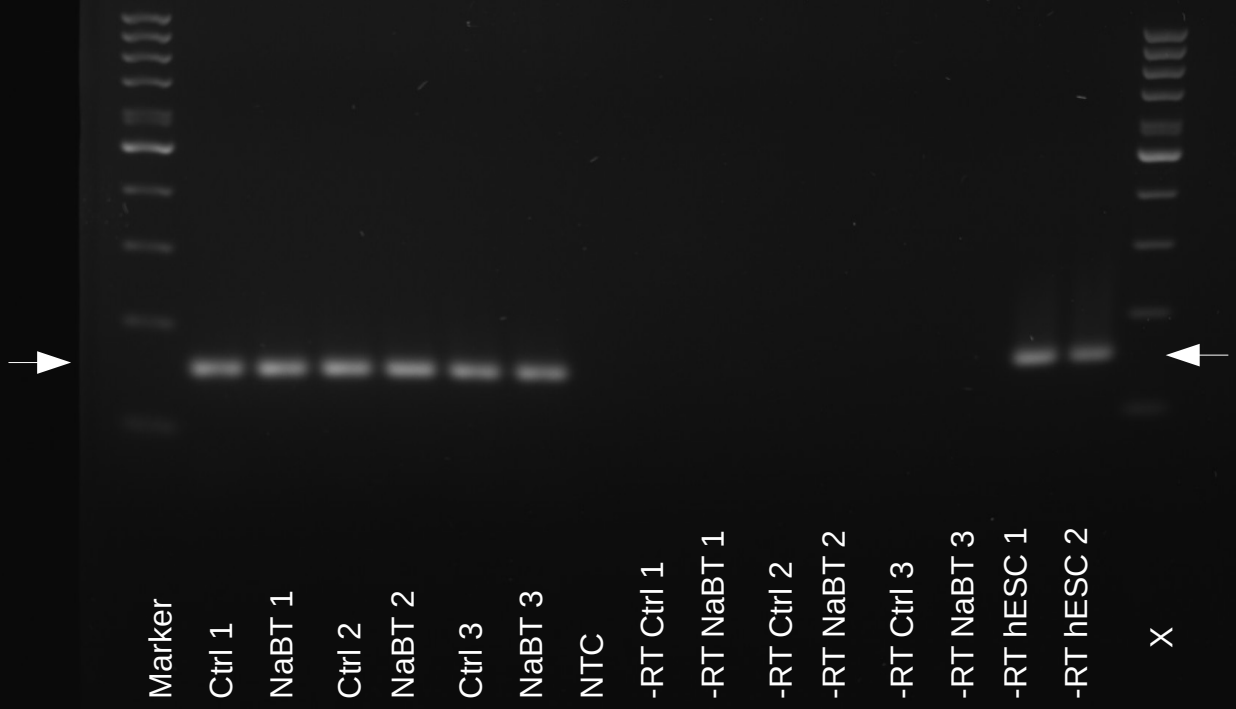

S3A Fig :  
GAPDH

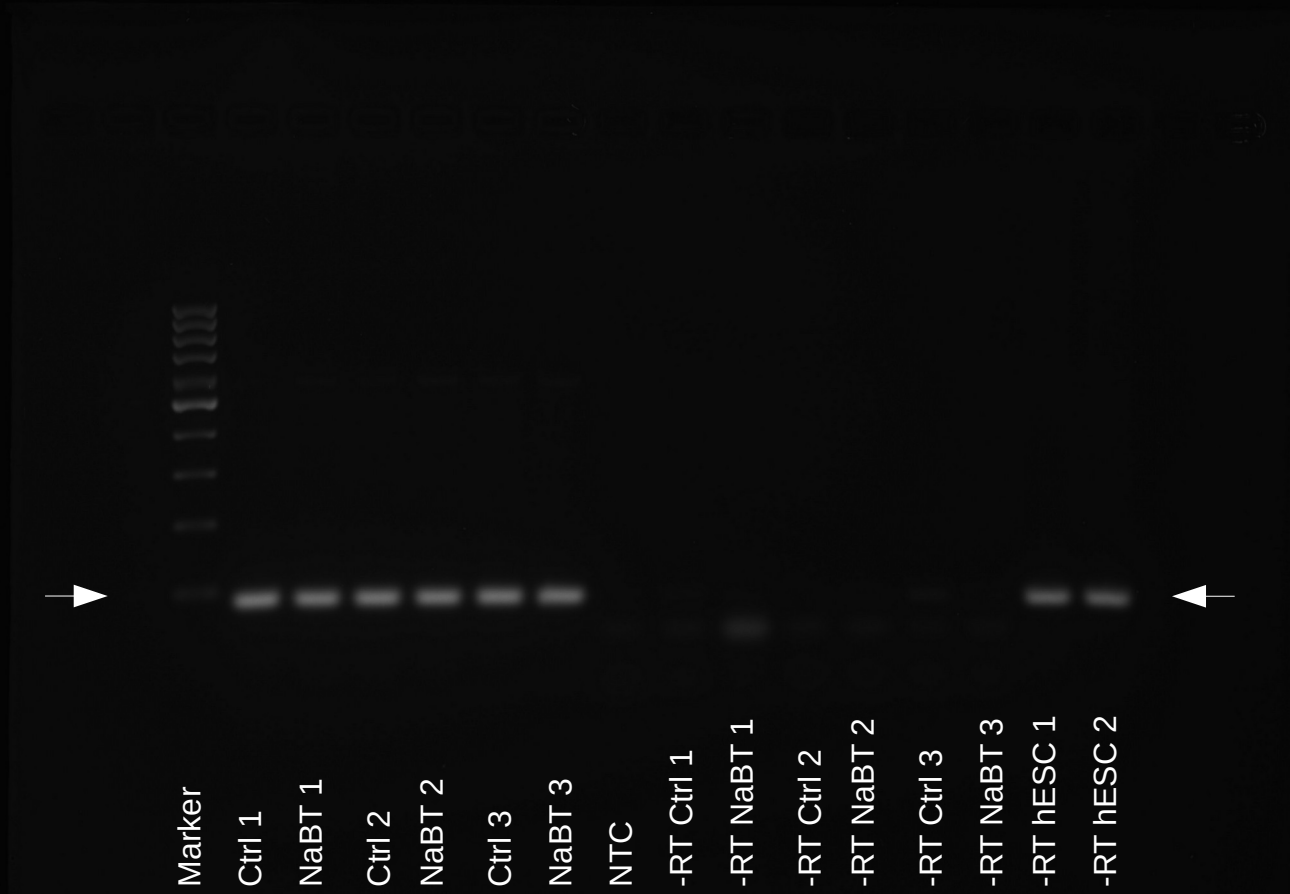

S3B Fig :  
OCT4 pseudogene,  
OCT4A

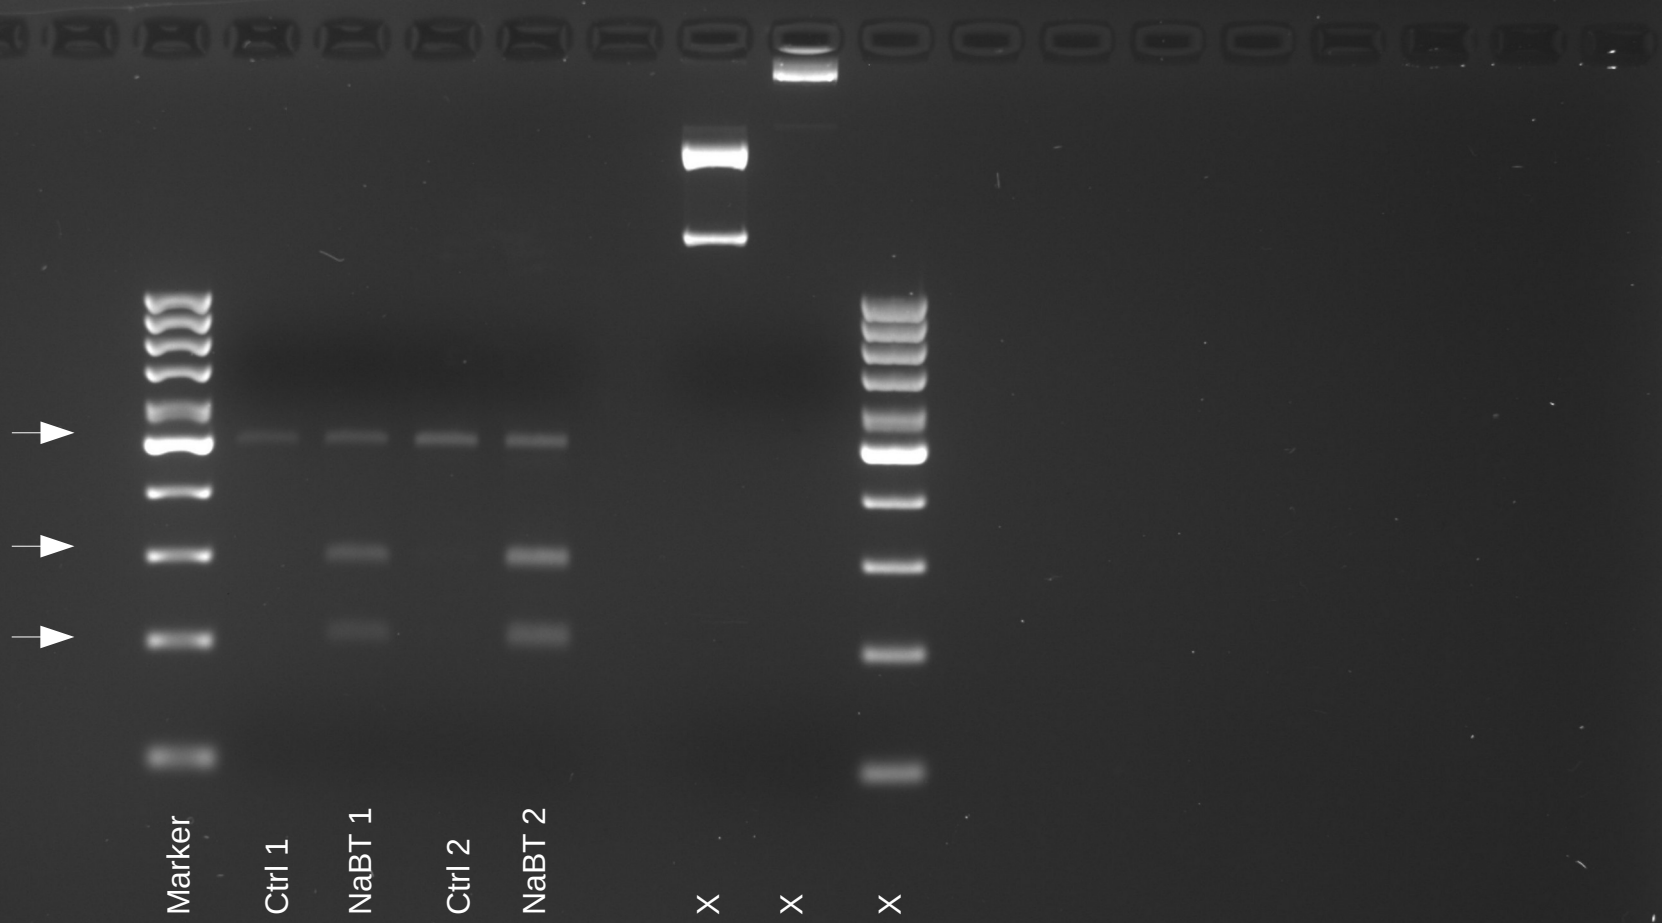

S4A Fig,  
1-4:  
OCT4A\*

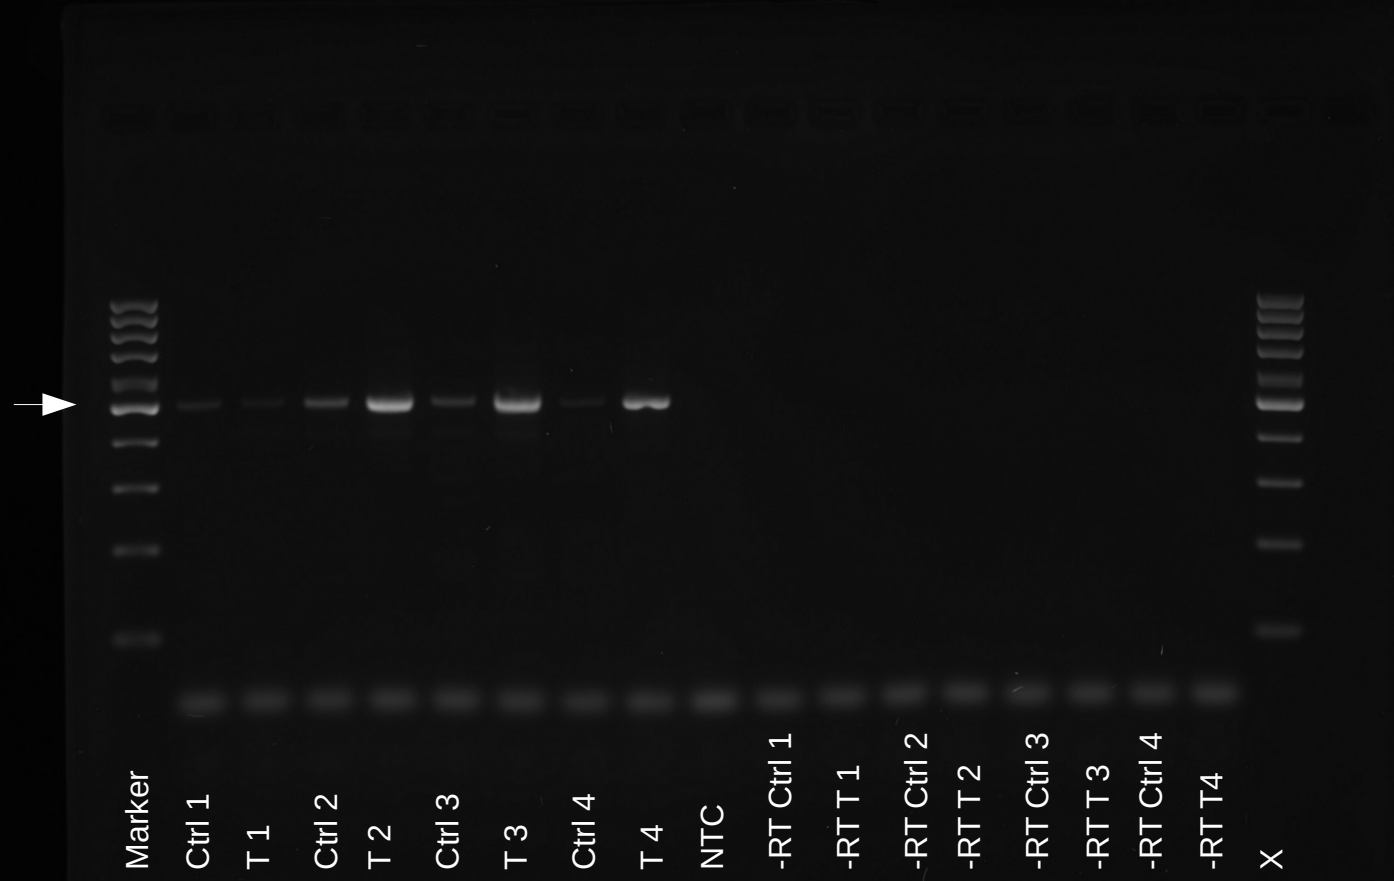

S4A Fig,  
1-4:  
OCT4B1  
OCT4B  
OCT4B4

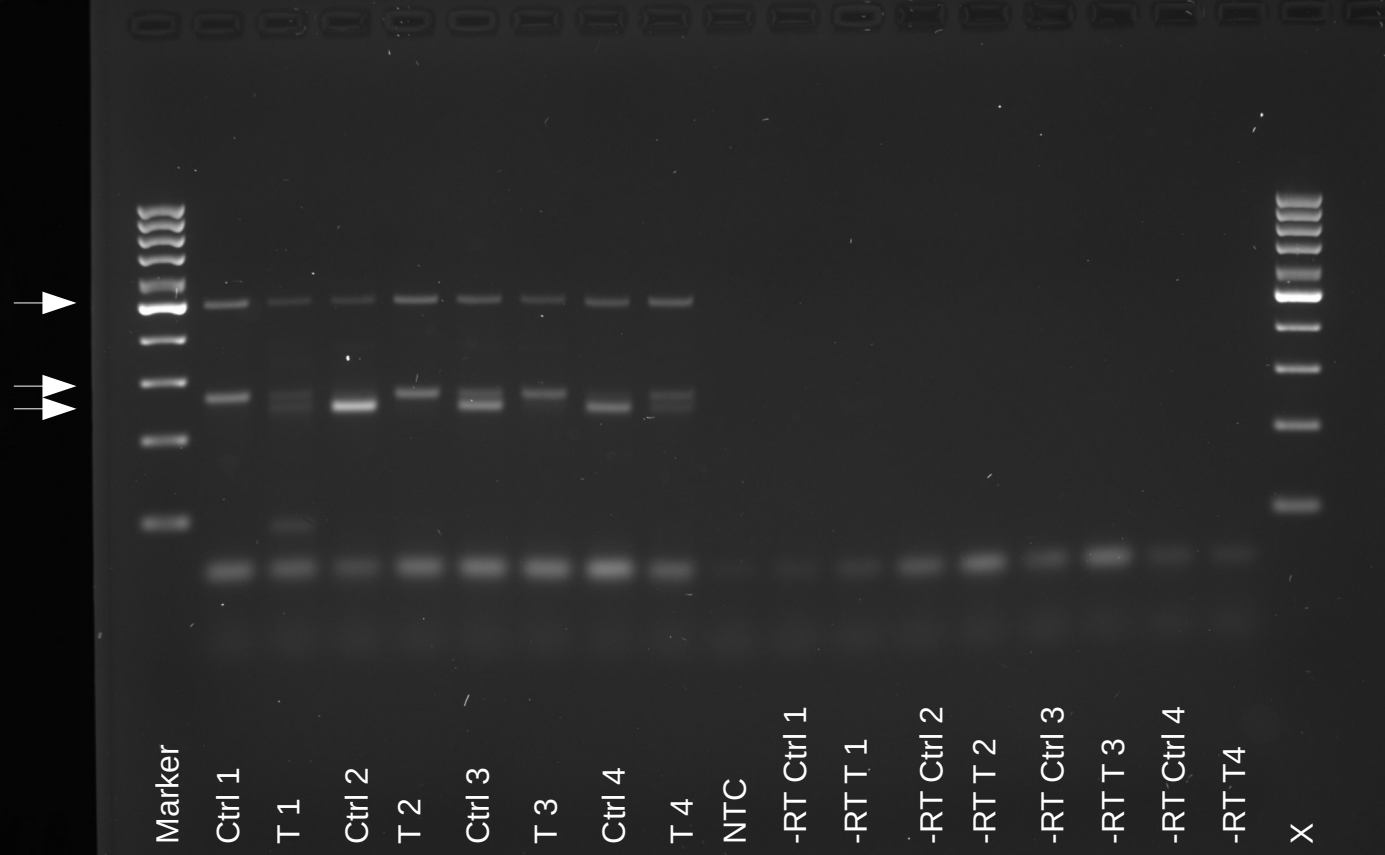

S4A Fig,  
1-4:  
NANOG1

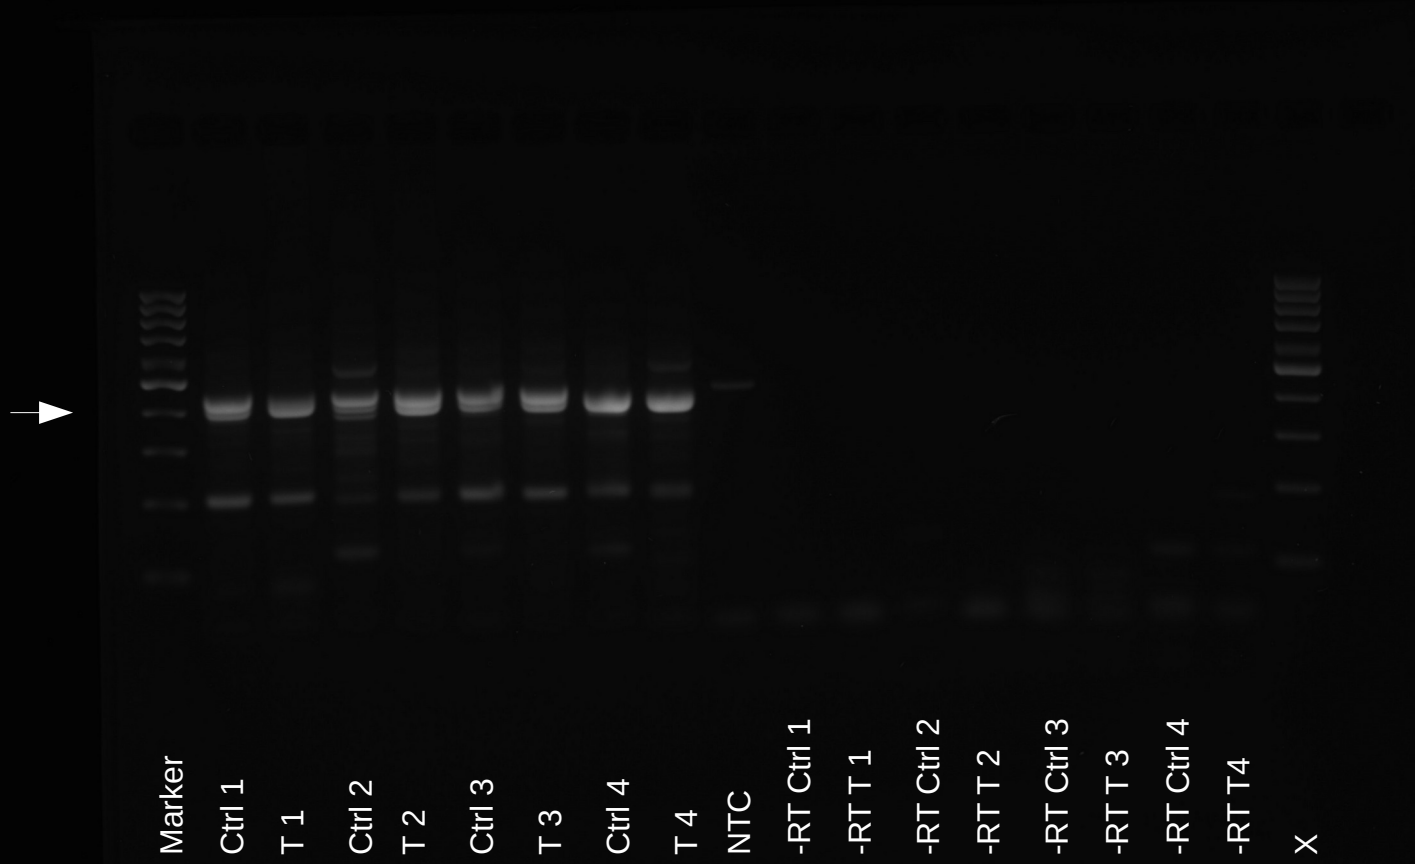

S4A Fig,  
1-4:  
SOX2

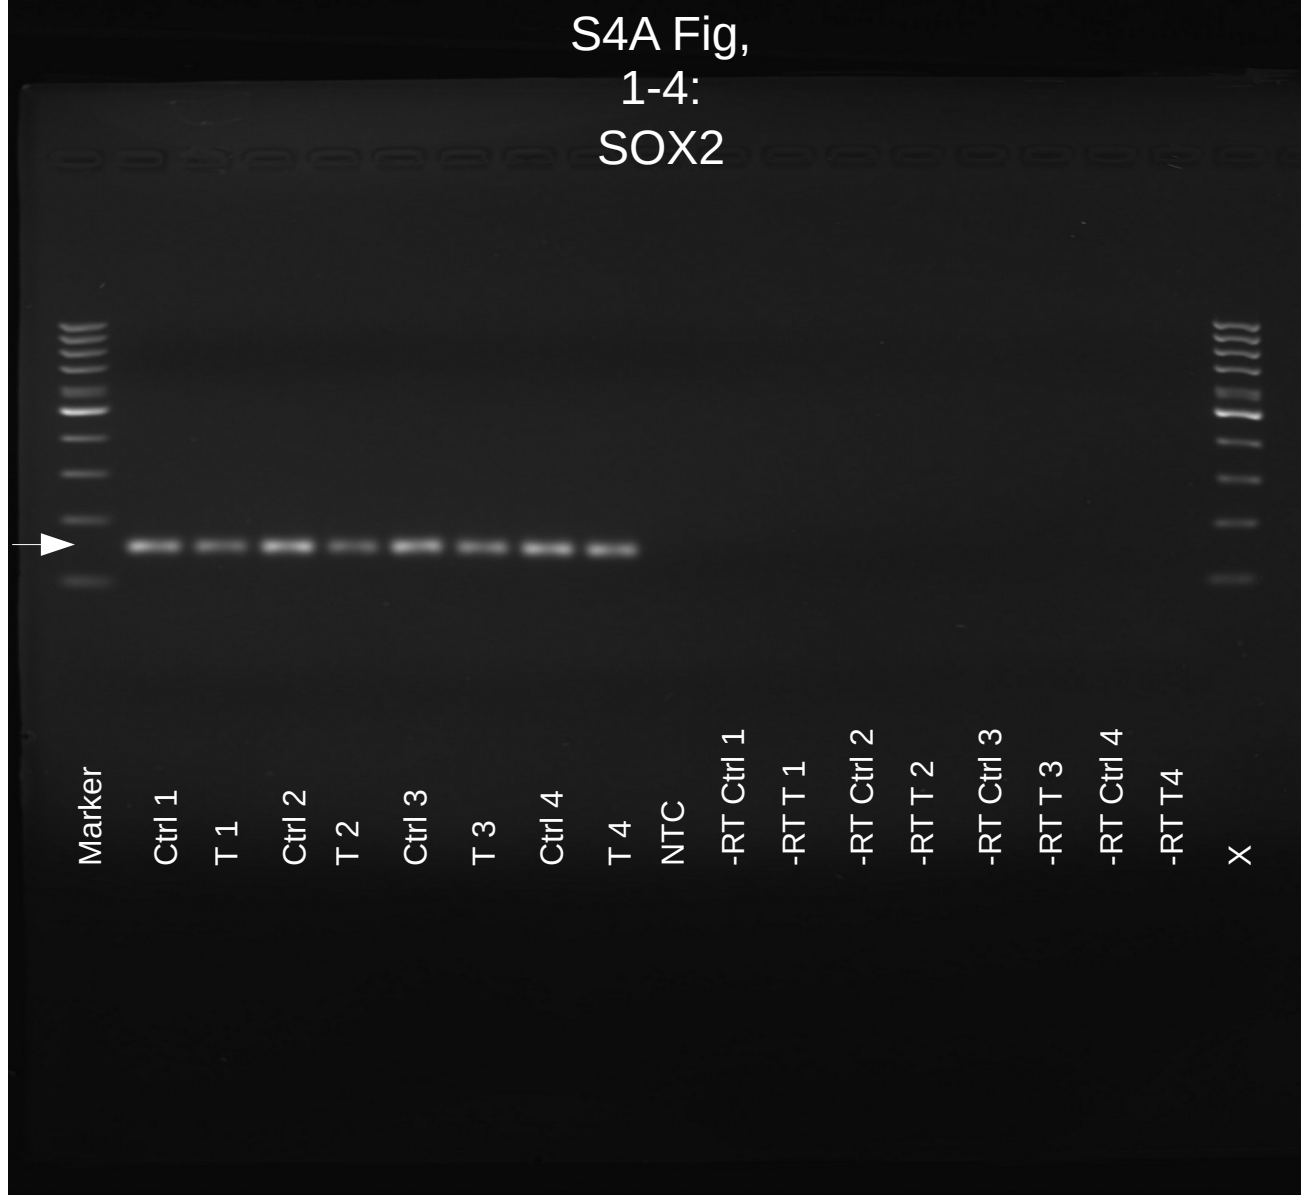

S4A Fig,  
1-4:  
GAPDH

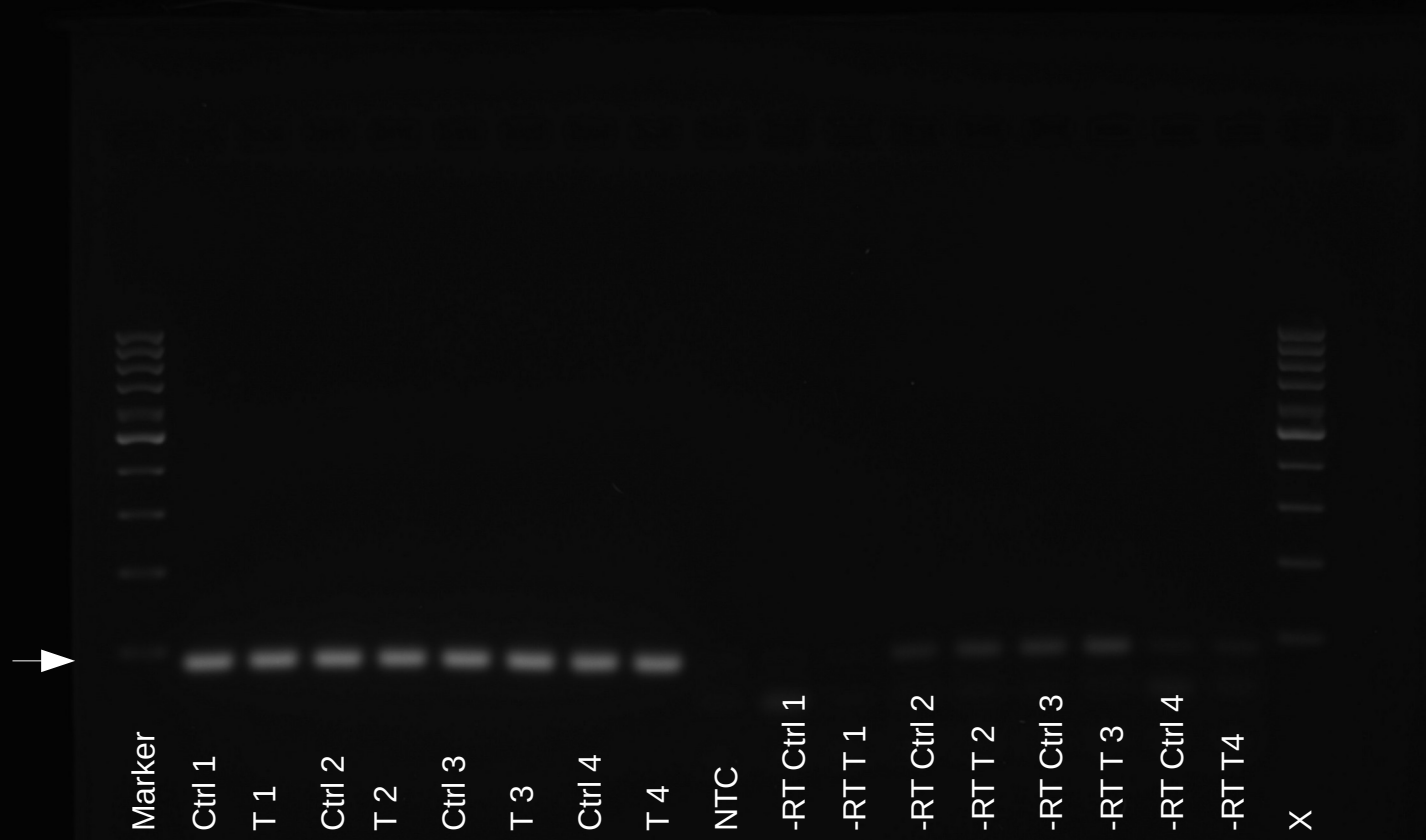

S4A Fig,  
5-8:  
OCT4A\*

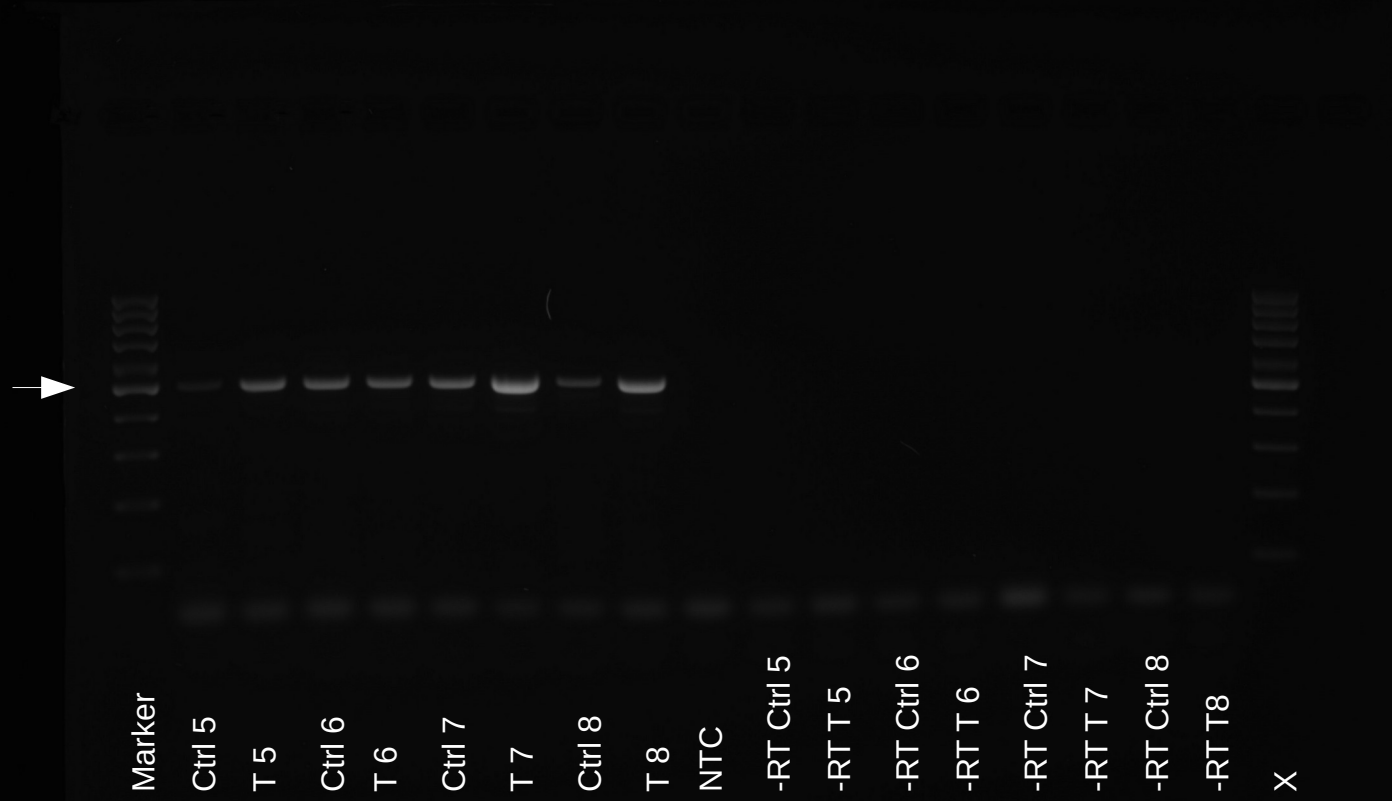

S4A Fig,  
5-8:  
OCT4B1  
OCT4B  
OCT4B4

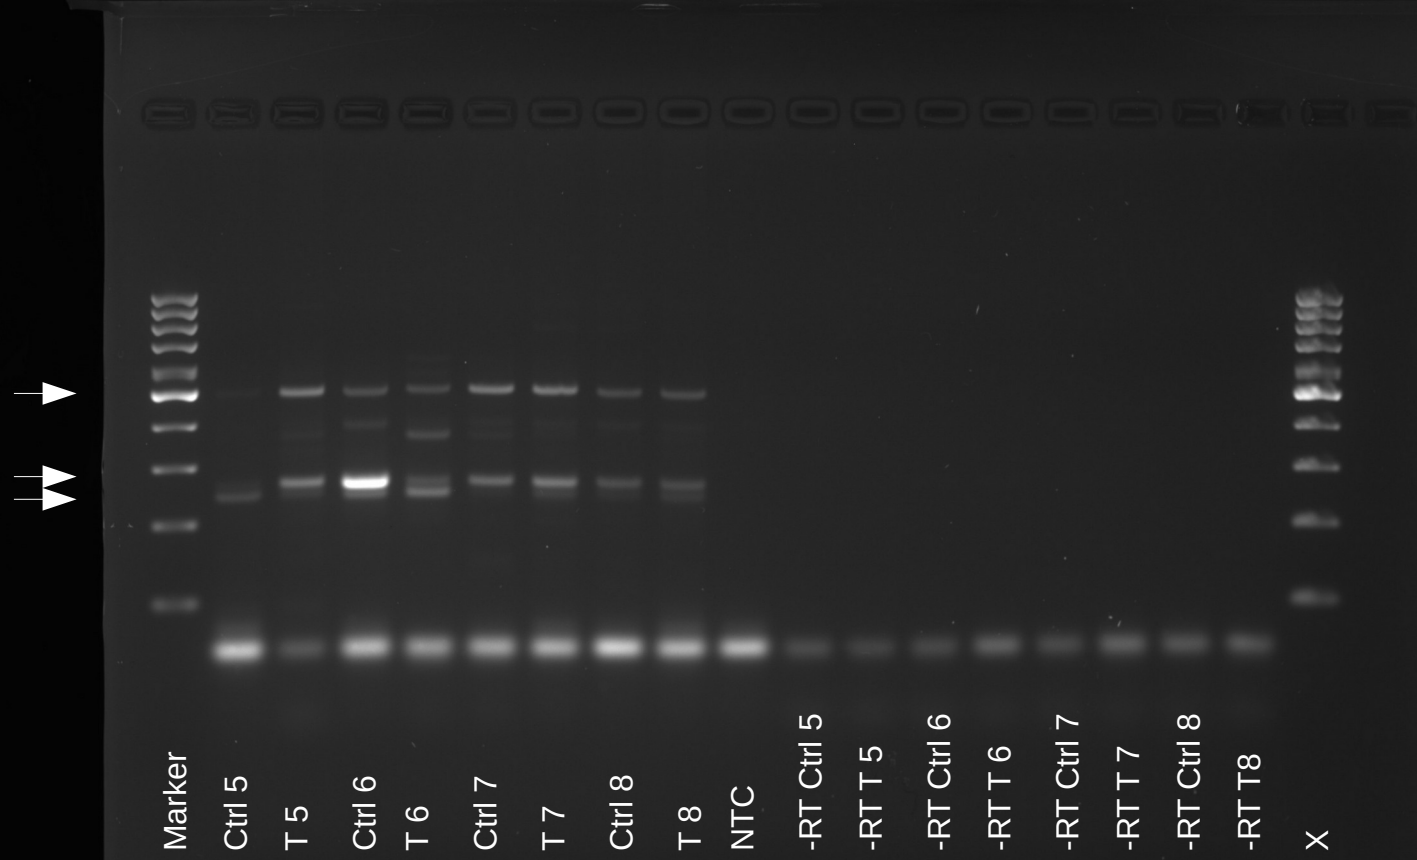

S4A Fig,  
5-8:  
NANOG1

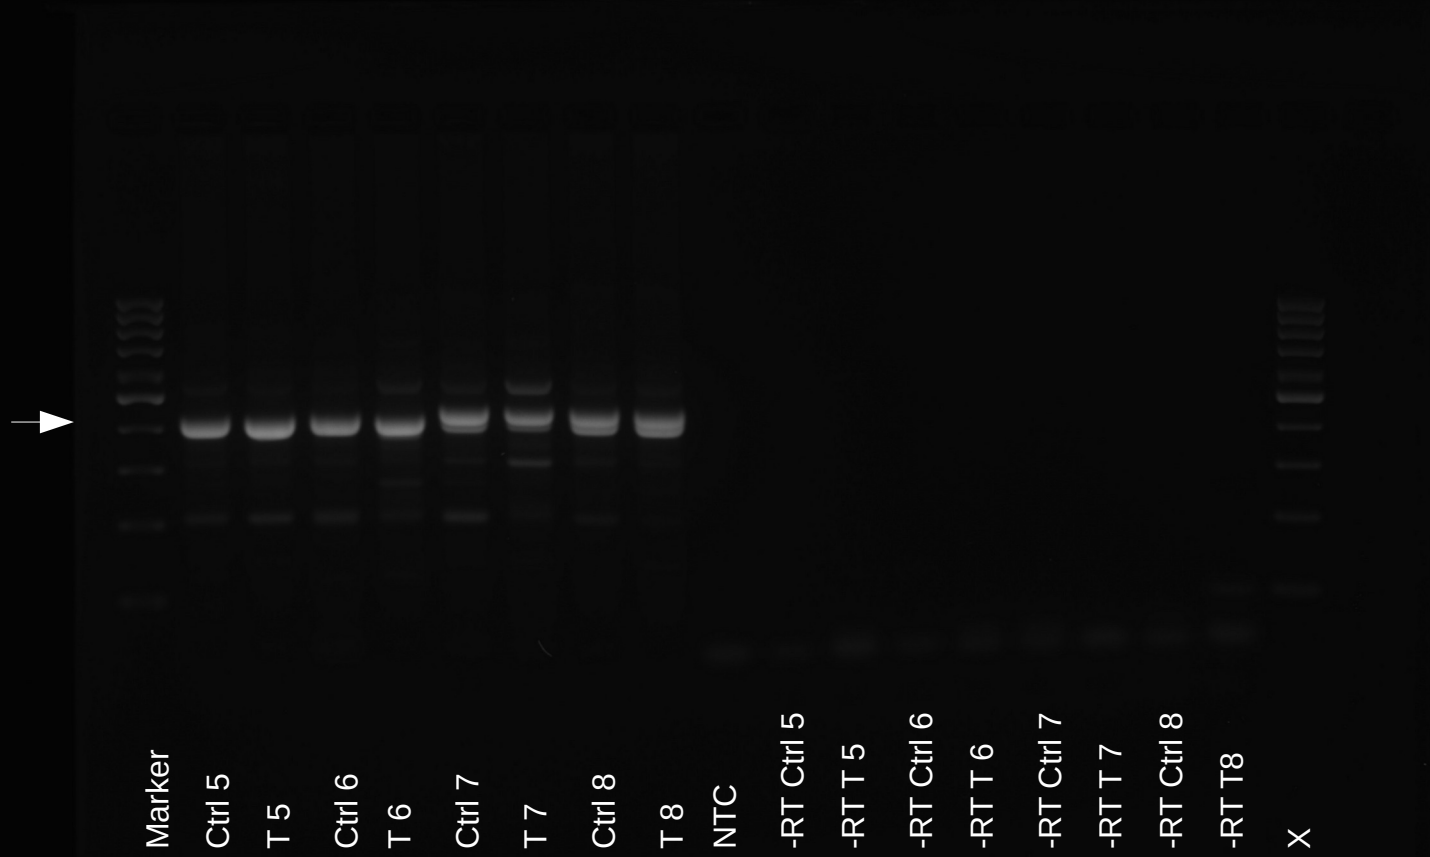

S4A Fig,  
5-8:  
SOX2

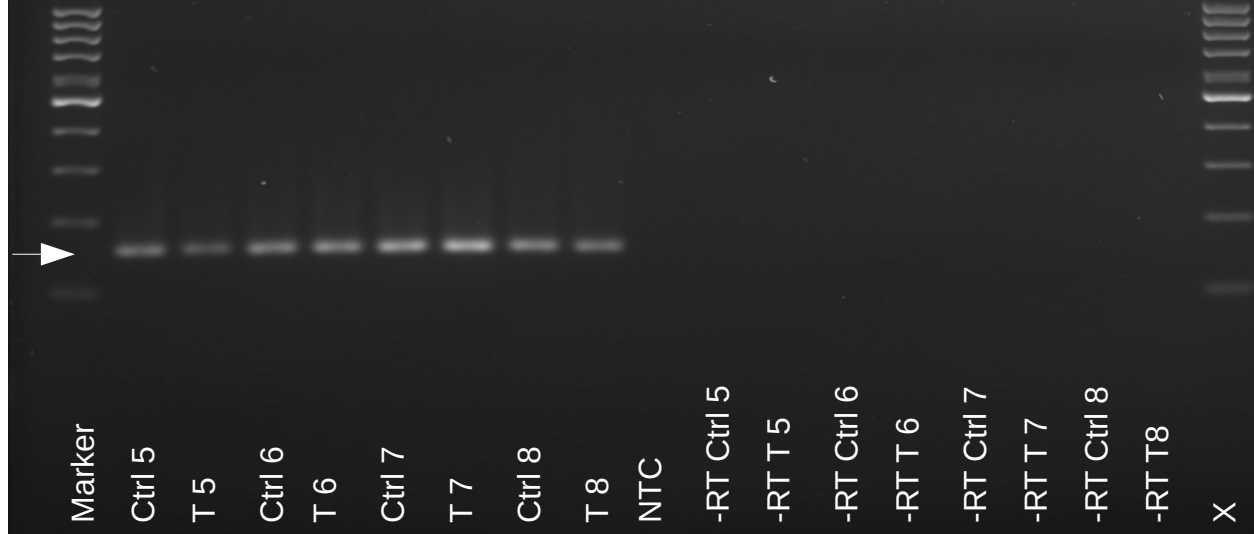

S4A Fig,  
5-8:  
GAPDH

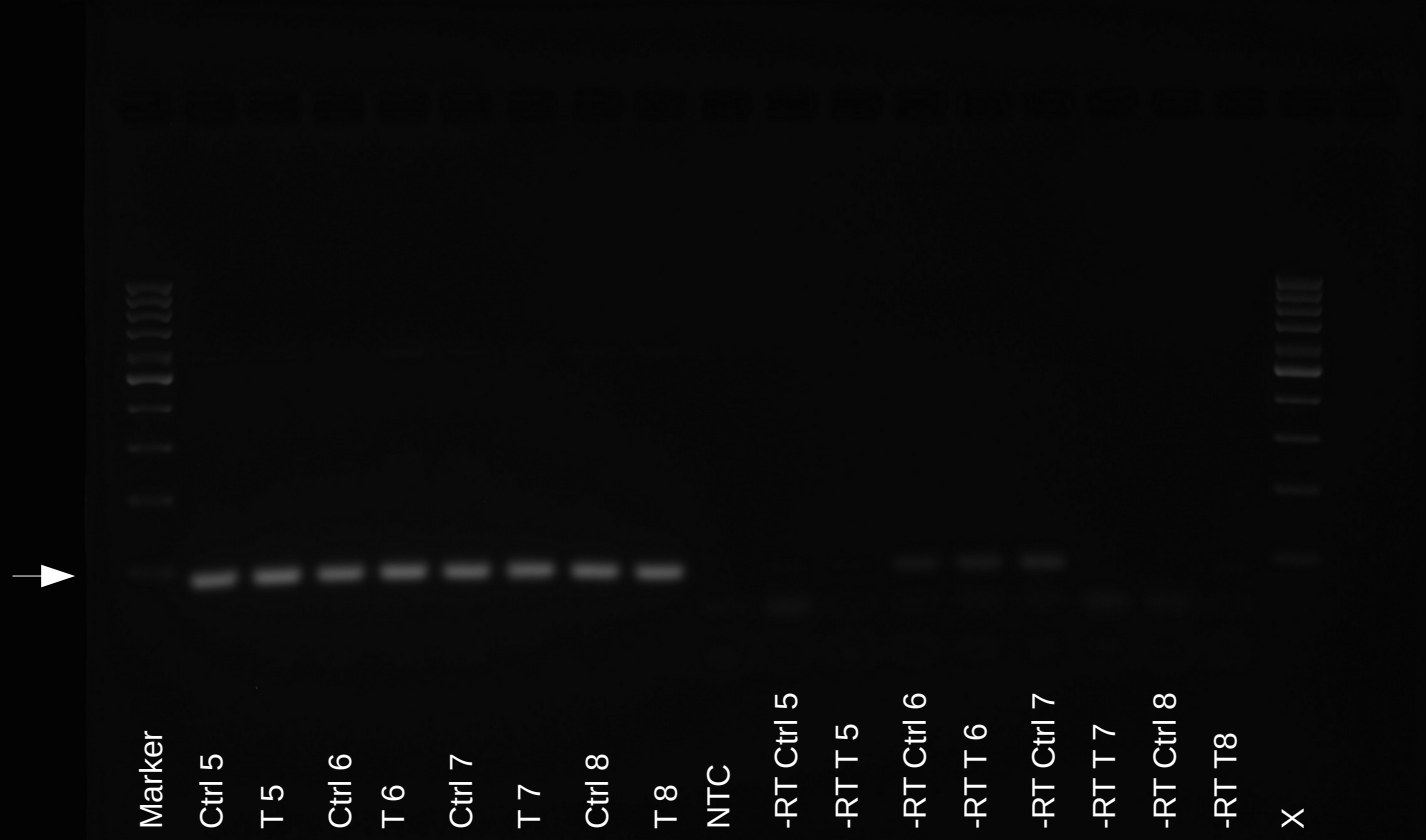

S4B Fig:

OCT4 pseudogene,  
OCT4A

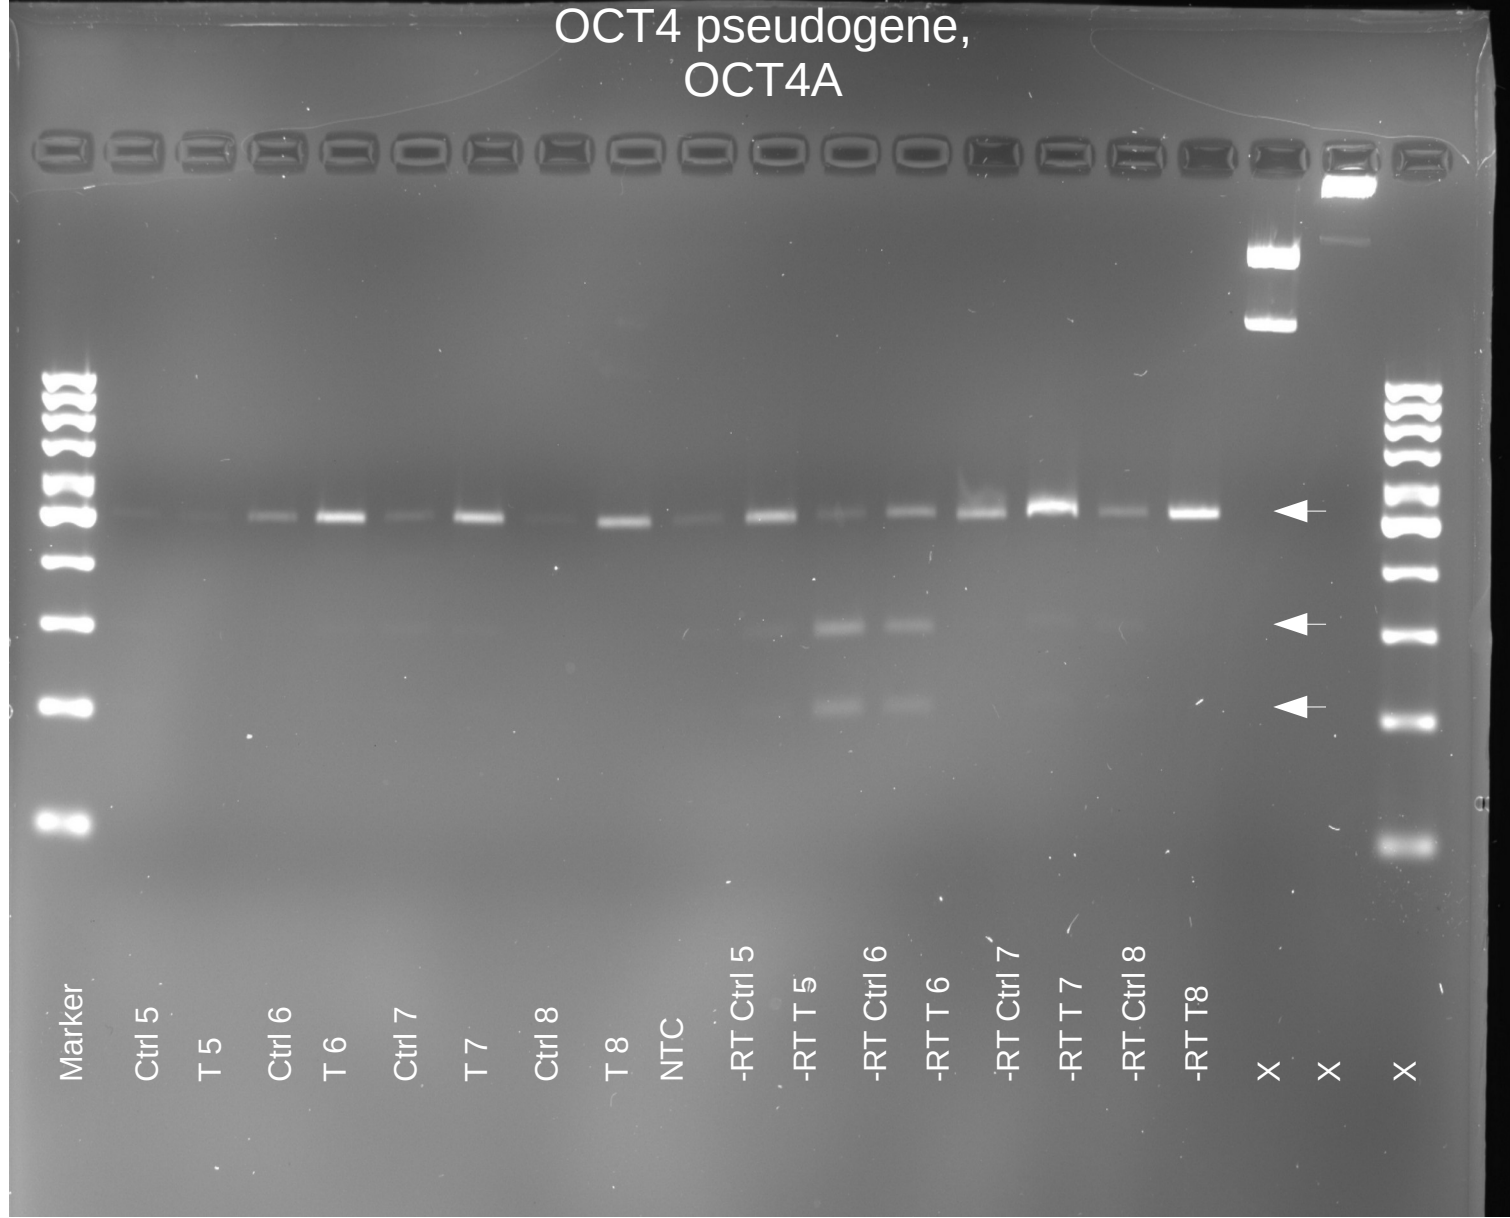

Source: https://storage.googleapis.com/plos-corpus-prod/10.1371/journal.pone.0245348/1/pone.0245348.s013.pdf
